# Supplementary material for: Antiviral Therapy for a Postpartum Flare in Women with Chronic HBV Infection Shortens the ALT Recovery Time and Reduces Hepatitis Re-Flare Rates within 4 years
Source: Hindawi journal article supplement (doi:10.1155/2022/4753267), 2022-06-20
Supplement: f1 [file 4753267.f1.zip]

Supplement table 1

| abbreviations |                                         |
|---------------|-----------------------------------------|
| PT-G          | prophylactic anti-HBV therapy group     |
| NPT-G         | non-prophylactic anti-HBV therapy group |
| AT-G          | anti-HBV therapy group                  |
| NAT-G         | non-anti-HBV therapy group              |
| ALT-NRF       | ALT no re-flare                         |
| ALT-RF        | ALT re-flare                            |
